# Supplementary material for: Anticancer Activity of Amb4269951, a Choline Transporter-Like Protein 1 Inhibitor, in Human Glioma Cells
Source: Pharmaceuticals (Basel). 2020 May 25;13(5):104. doi: 10.3390/ph13050104 (PMC7281368; doi:10.3390/ph13050104)
Supplement: Supplementary file 1 [file pharmaceuticals-13-00104-s001.pdf]

## Supplementary Materials

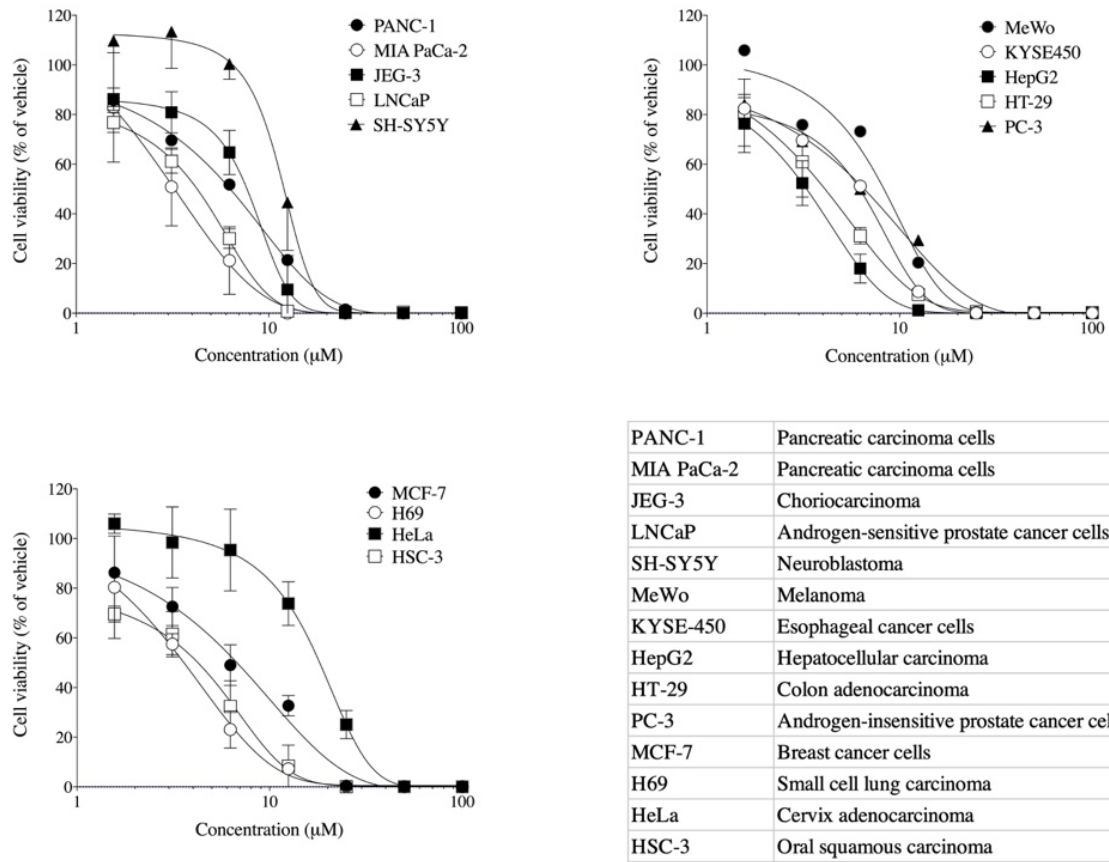

**Figure S1:** Effect of Amb4269951 on cell viability in various cancer cell lines. Cells were pre-incubated with various concentrations of Amb4269951 for 24 h, and then the cells were counted. The results are given as a percentage of the findings in the vehicle control. Each point represents the mean ± S.D. (n = 4).
